# Supplementary figures and images for: B 2 O 3 supported La 0.8 Sr 0.2 FeO 3 for direct ethane oxidation into ethylene and syngas for hydroformylation synthesis
Source: Royal Society of Chemistry journal article supplement (doi:10.1039/d4cy01268b), 2024-11-19

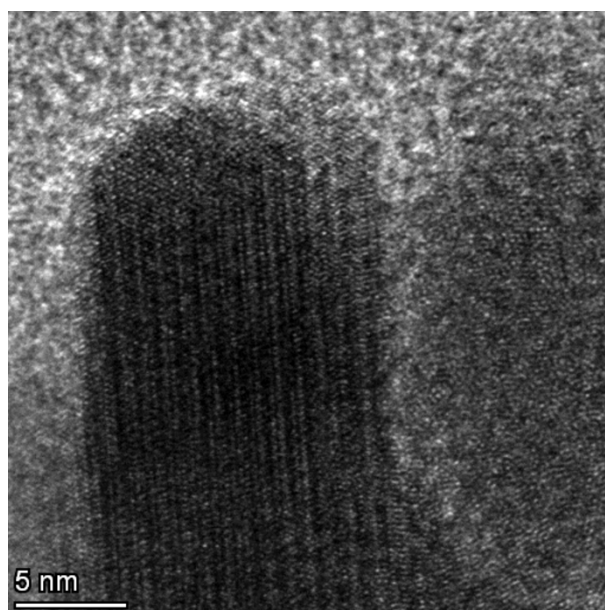

Fig S1: TEM images of LSF@20B<sub>2</sub>O<sub>3</sub>.

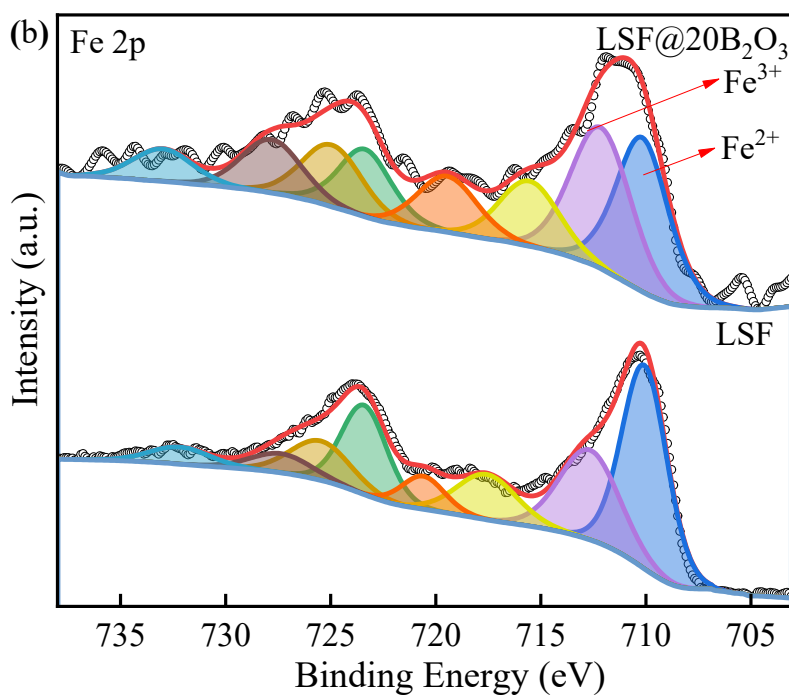

Fig S2: Fe 2p XPS spectra.

Supplement: d4cy01268b1.pdf [file d4cy01268b1.pdf]
